# Supplementary material for: Silent geographical spread of the H7N9 virus by online knowledge analysis of the live bird trade with a distributed focused crawler
Source: PubMed Central journal article supplement — Emerg Microbes Infect. 2013 Dec 18;2(12):e89–. doi: 10.1038/emi.2013.91 (PMC3880875; doi:10.1038/emi.2013.91), 2013-12-18
Supplement: emi201391x1.pdf [file emi201391x1.pdf]

## Supplementary information

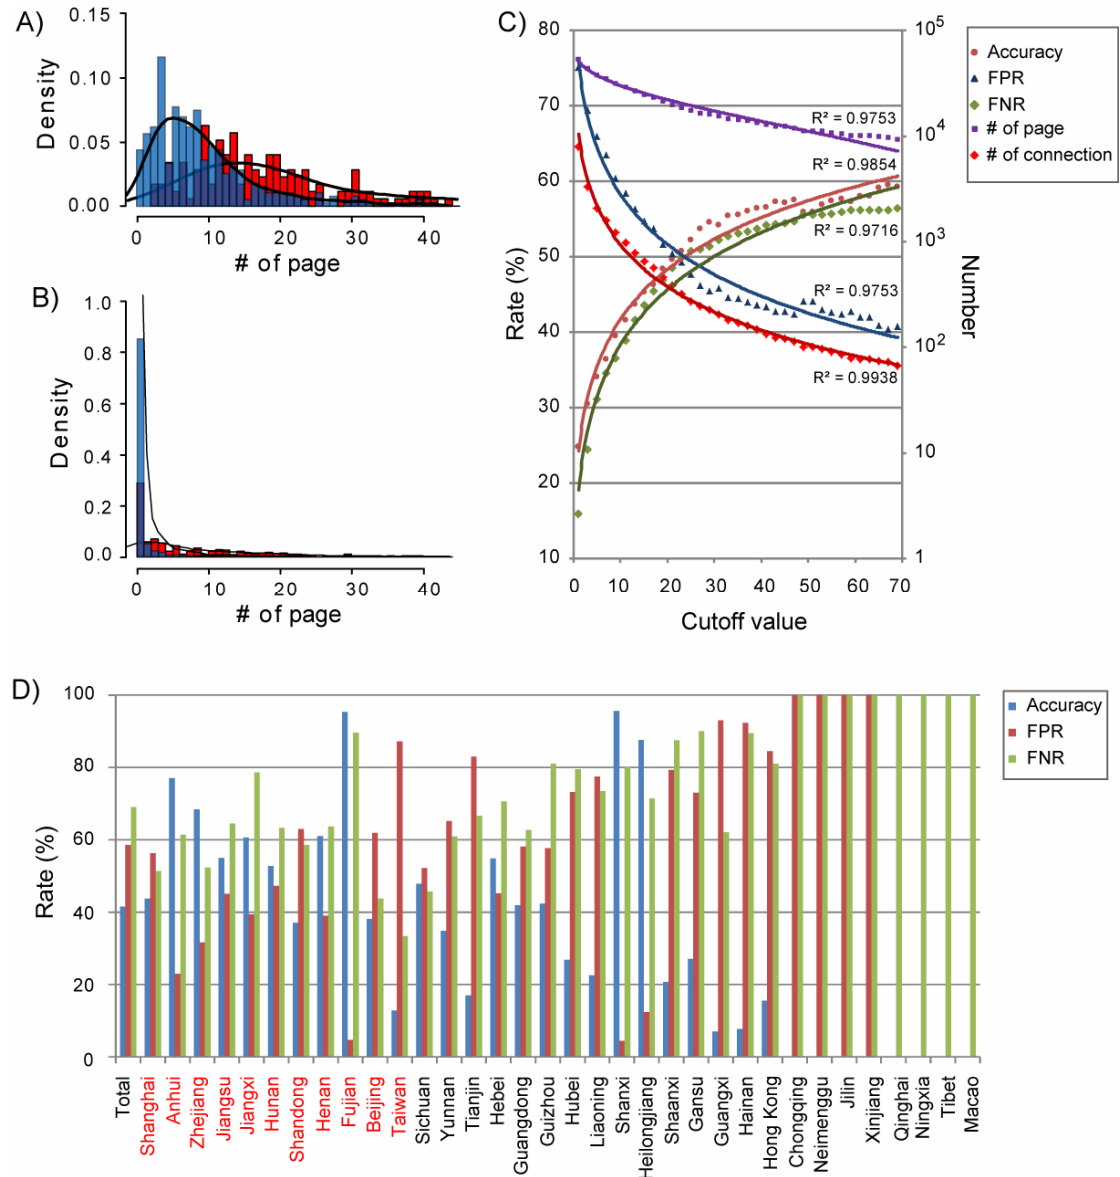

**Fig. S1**

Cutoff selection for automatically searched information. Density distribution of Web page numbers obtained by focused crawler (A) for provinces and B) for cities. The blue bars represent the IC validated by CC. The red bars indicate the inconsistent numbers. (C) Distribution of Web page numbers, connections, accuracy ratio, FPR, and FNR according to cutoff values. D) Accuracy ratio, FPR, and FNR of each province under the selected cutoff value. The provinces in red indicate where infected patients were recorded.

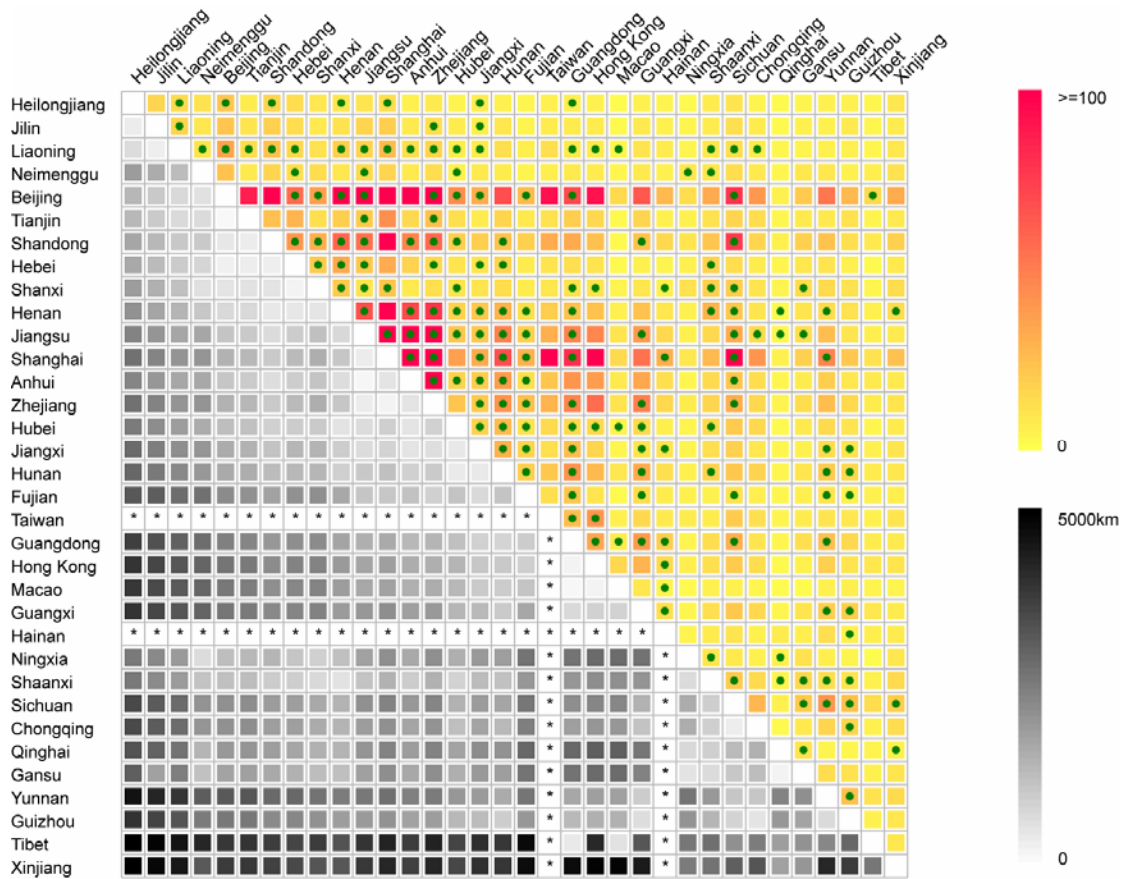

**Fig. S2**

Comparison of IC and CC between two provinces. IC number is indicated by yellow to red according to the increasing number on the upper right of the figure. The green point indicates the CC-validated connections. For control, the highway mileage between the capital city for each pair is indicated on the lower left by a gray square. Taiwan and Hainan do not have road data with Mainland China.

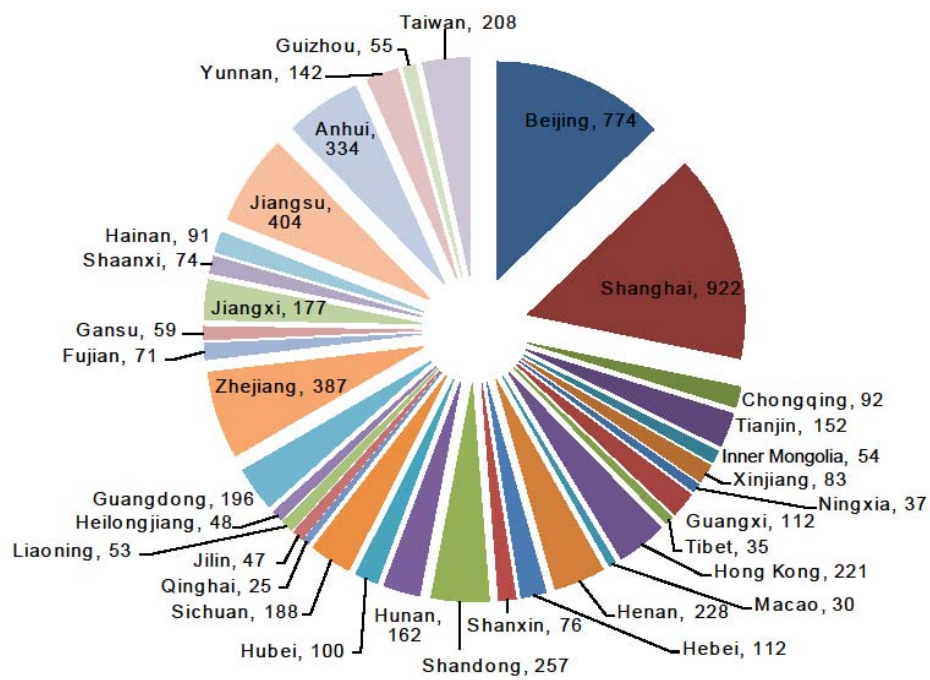

**Fig. S3**

Distribution of Web site pages searched by the distributed focused crawler methodology

**Table S1**

Number of provinces connected to each province

| <b>Province</b> | <b>No. of connected provinces</b> | <b>Connected provinces</b>                                                                                                                                                                  |
|-----------------|-----------------------------------|---------------------------------------------------------------------------------------------------------------------------------------------------------------------------------------------|
| Anhui           | 10                                | Beijing, Henan, Hubei, Hunan, Jiangsu, Jiangxi, Shandong, Shanghai, Sichuan, Zhejiang                                                                                                       |
| Beijing         | 5                                 | Guangdong, Heilongjiang, Hubei, Shanxi, Sichuan                                                                                                                                             |
| Chongqing       | 1                                 | Guizhou                                                                                                                                                                                     |
| Fujian          | 13                                | Anhui, Beijing, Guangdong, Guangxi, Guizhou, Hubei, Hunan, Jiangsu, Jiangxi, Shanghai, Sichuan, Yunnan, Zhejiang                                                                            |
| Gansu           | 3                                 | Shanxi, Shaanxi, Sichuan                                                                                                                                                                    |
| Guangdong       | 8                                 | Guangxi, Hainan, Heilongjiang, Hubei, Hunan, Shanghai, Shanxi, Yunnan                                                                                                                       |
| Guangxi         | 4                                 | Guangdong, Guizhou, Hunan, Shandong                                                                                                                                                         |
| Guizhou         | 3                                 | Hainan, Hunan, Yunnan                                                                                                                                                                       |
| Hainan          | 3                                 | Guangdong, Guangxi, Shanxi                                                                                                                                                                  |
| Hebei           | 9                                 | Beijing, Henan, Hunan, Jiangsu, Liaoning, Inner Mongolia, Shandong, Shanxi, Shaanxi                                                                                                         |
| Heilongjiang    | 1                                 | Shandong                                                                                                                                                                                    |
| Henan           | 17                                | Anhui, Beijing, Fujian, Guangdong, Hebei, Heilongjiang, Hubei, Hunan, Jiangsu, Liaoning, Shandong, Shanxi, Shaanxi, Sichuan, Xinjiang, Yunnan, Zhejiang                                     |
| Hong Kong       | 5                                 | Guangdong, Hainan, Hubei, Shanxi, Taiwan                                                                                                                                                    |
| Hubei           | 5                                 | Guangxi, Henan, Hunan, Inner Mongolia, Shaanxi                                                                                                                                              |
| Hunan           | 6                                 | Guangdong, Guangxi, Guizhou, Hubei, Jiangsu, Yunnan                                                                                                                                         |
| Jiangsu         | 20                                | Anhui, Beijing, Chongqing, Gansu, Guangdong, Guangxi, Hebei, Henan, Hubei, Hunan, Jiangxi, Liaoning, Inner Mongolia, Qinghai, Shandong, Shanghai, Shanxi, Sichuan, Tianjin, Zhejiang        |
| Jiangxi         | 17                                | Anhui, Beijing, Fujian, Guangdong, Guangxi, Guizhou, Hainan, Hebei, Heilongjiang, Henan, Hubei, Hunan, Jilin, Liaoning, Shanghai, Yunnan, Zhejiang                                          |
| Jilin           | 0                                 |                                                                                                                                                                                             |
| Liaoning        | 20                                | Anhui, Beijing, Chongqing, Guangdong, Hebei, Heilongjiang, Henan, Hong Kong, Hubei, Jiangsu, Jiangxi, Jilin, Macao, Inner Mongolia, Shandong, Shanghai, Shaanxi, Sichuan, Tianjin, Zhejiang |
| Macao           | 3                                 | Guangdong, Hainan, Hubei                                                                                                                                                                    |
| Inner Mongolia  | 2                                 | Ningxia, Shaanxi                                                                                                                                                                            |
| Ningxia         | 1                                 | Shaanxi                                                                                                                                                                                     |
| Qinghai         | 5                                 | Gansu, Henan, Ningxia, Shaanxi, Xinjiang                                                                                                                                                    |
| Shandong        | 6                                 | Anhui, Henan, Hubei, Hunan, Shanxi, Zhejiang                                                                                                                                                |
| Shanghai        | 7                                 | Guangdong, Hainan, Heilongjiang, Hunan, Shanxi, Sichuan, Yunnan                                                                                                                             |
| Shanxi          | 3                                 | Hebei, Hubei, Shaanxi                                                                                                                                                                       |
| Shaanxi         | 4                                 | Guizhou, Hunan, Shanxi, Sichuan                                                                                                                                                             |

|          |    |                                                                                                                           |
|----------|----|---------------------------------------------------------------------------------------------------------------------------|
| Sichuan  | 9  | Anhui, Guangdong, Guizhou, Jiangsu, Shandong, Shanxi, Shaanxi, Yunnan, Zhejiang                                           |
| Taiwan   | 1  | Guangdong                                                                                                                 |
| Tianjin  | 0  |                                                                                                                           |
| Xinjiang | 1  | Sichuan                                                                                                                   |
| Tibet    | 1  | Beijing                                                                                                                   |
| Yunnan   | 5  | Guangdong, Guangxi, Guizhou, Shaanxi, Sichuan                                                                             |
| Zhejiang | 14 | Anhui, Beijing, Guangdong, Guangxi, Hebei, Hunan, Jiangsu, Jiangxi, Jilin, Liaoning, Shandong, Shanghai, Sichuan, Tianjin |

---
